# Supplementary material for: Electrically conductive aluminum ion-reinforced MXene films for efficient electromagnetic interference shielding
Source: Royal Society of Chemistry journal article supplement (doi:10.1039/c9tc06304h), 2019-12-25
Supplement: c9tc06304h1.pdf [file c9tc06304h1.pdf]

## Supporting Information

### **Electrically conductive aluminum ion-reinforced MXene films for efficient electromagnetic interference shielding**

Zhangshuo Liu,<sup>a‡</sup> Yu Zhang,<sup>a‡</sup> Hao-Bin Zhang,<sup>a\*</sup> Yang Dai,<sup>b</sup> Ji Liu,<sup>c</sup> Xiaofeng Li<sup>b</sup> and Zhong-Zhen Yu<sup>b\*</sup>

<sup>a</sup> Beijing Key Laboratory of Advanced Functional Polymer Composites, Beijing University of Chemical Technology, Beijing 100029, China

<sup>b</sup> State Key Laboratory of Organic-Inorganic Composites, College of Materials Science and Engineering, Beijing University of Chemical Technology Beijing 100029, China

<sup>c</sup> College of Materials Science and Engineering, Hunan University, Changsha 410012, China

\* E-mail: [zhanghaobin@mail.buct.edu.cn](mailto:zhanghaobin@mail.buct.edu.cn) (H.-B. Zhang); [yuzz@mail.buct.edu.cn](mailto:yuzz@mail.buct.edu.cn) (Z.-Z. Yu)

‡ These authors contributed equally to this work.

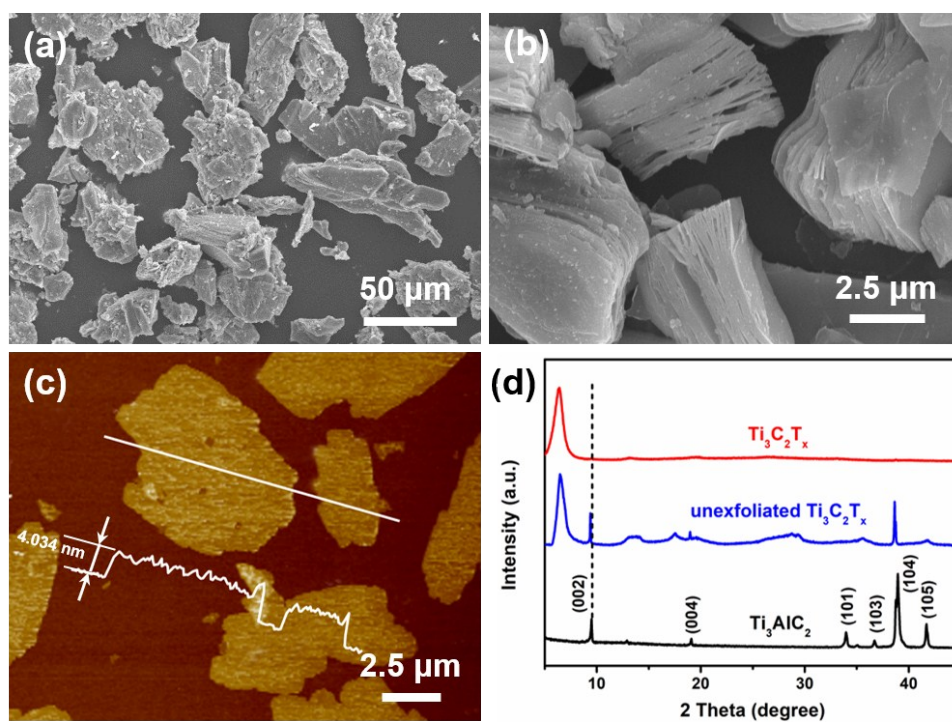

**Fig. S1.** SEM images of (a)  $\text{Ti}_3\text{AlC}_2$  and (b) unexfoliated  $\text{Ti}_3\text{C}_2\text{T}_x$ . (c) AFM image of  $\text{Ti}_3\text{C}_2\text{T}_x$  sheets deposited on a silicon wafer. (d) XRD patterns of  $\text{Ti}_3\text{AlC}_2$ , unexfoliated  $\text{Ti}_3\text{C}_2\text{T}_x$  and  $\text{Ti}_3\text{C}_2\text{T}_x$ .

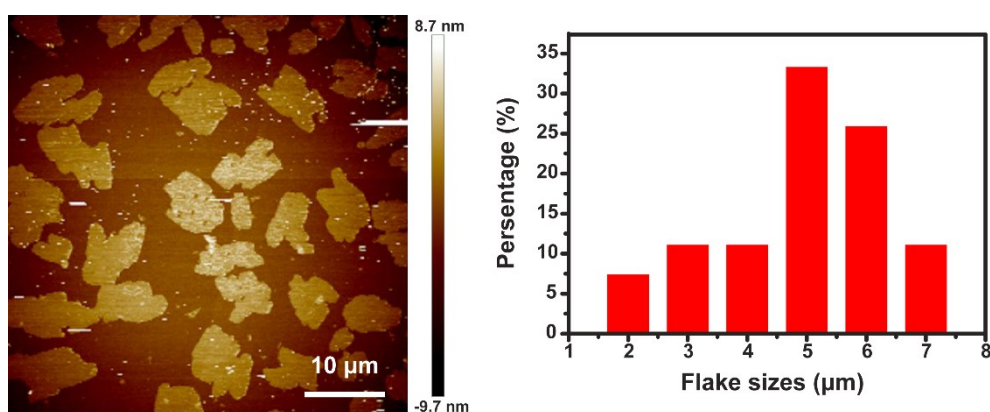

**Fig. S2.** AFM image and size distribution of MXene sheets.

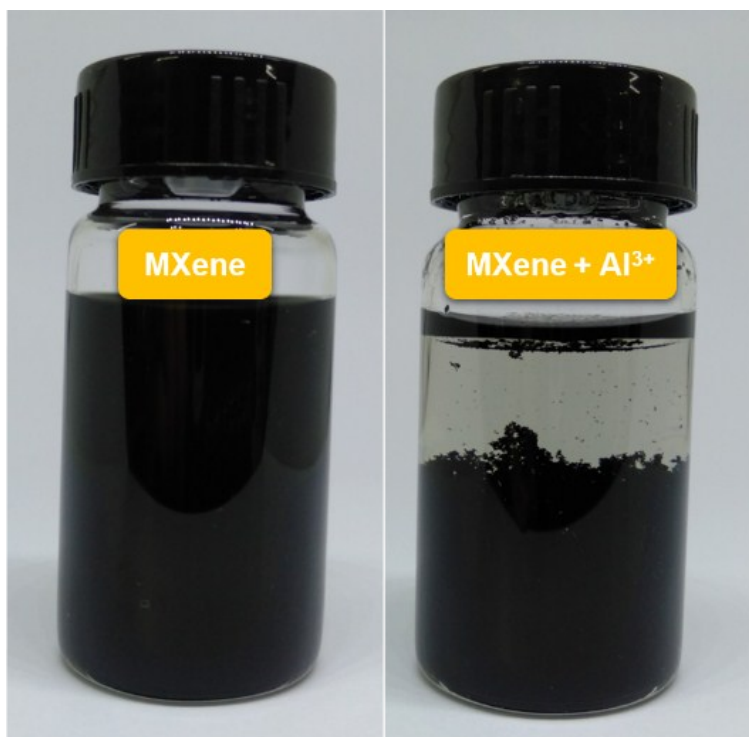

**Fig. S3.** Digital images of an aqueous mixture of MXene (left) and a suspension of MXene with  $\text{Al}^{3+}$  (right).

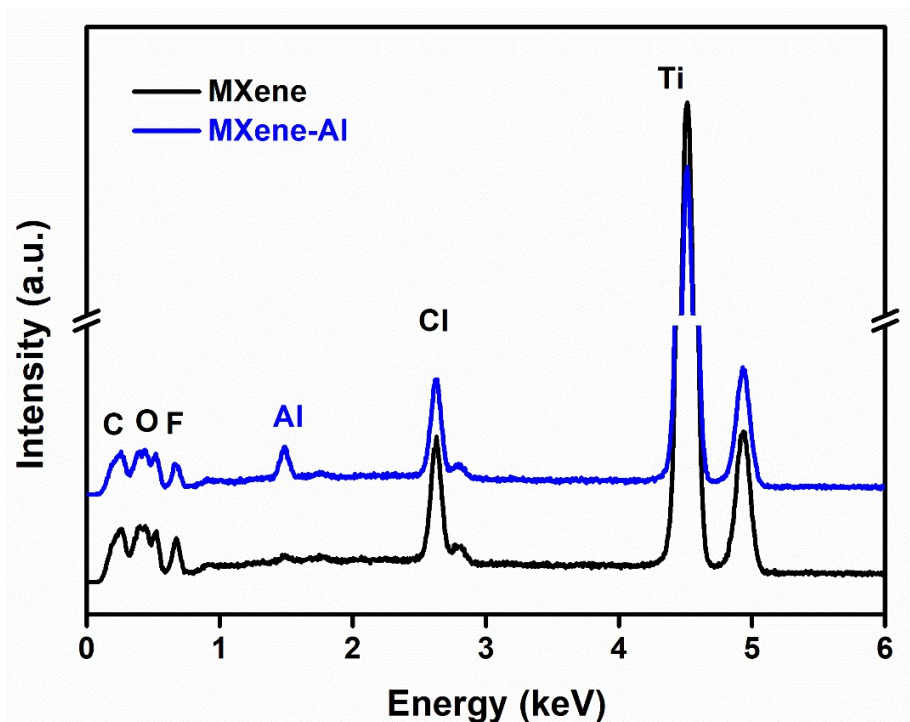

**Fig. S4.** EDS spectra of MXene and MXene-Al films.

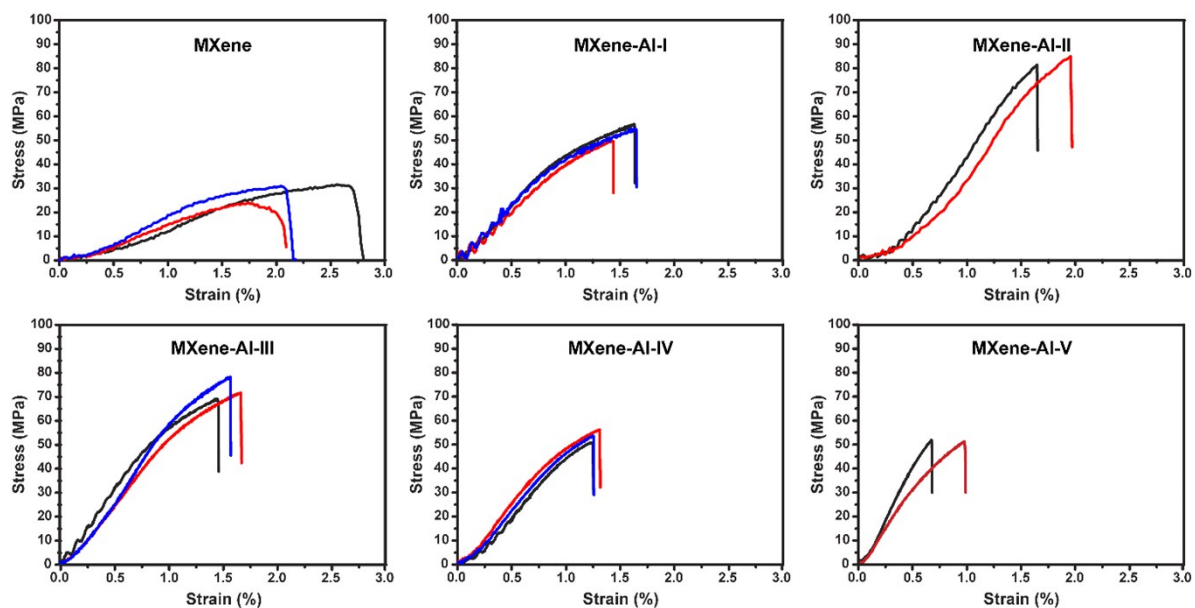

Fig. S5. Tensile stress-strain curves of pristine MXene film, and MXene-Al films.

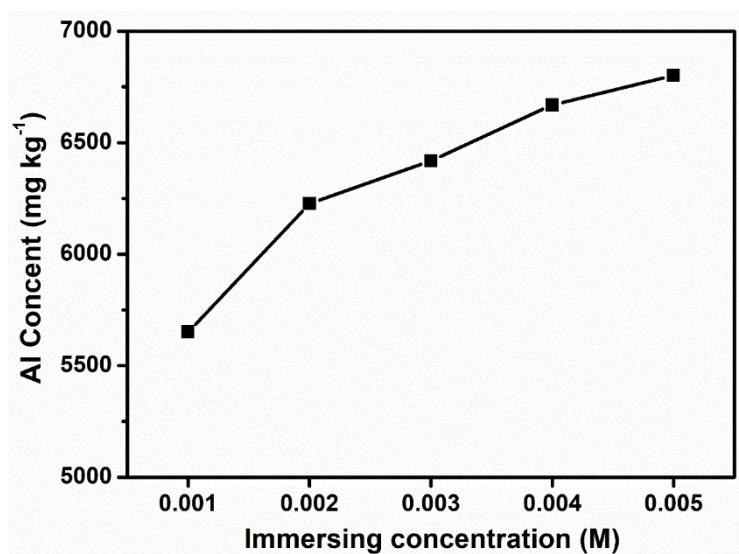

Fig. S6. The concentrations of Al in MXene-Al film.

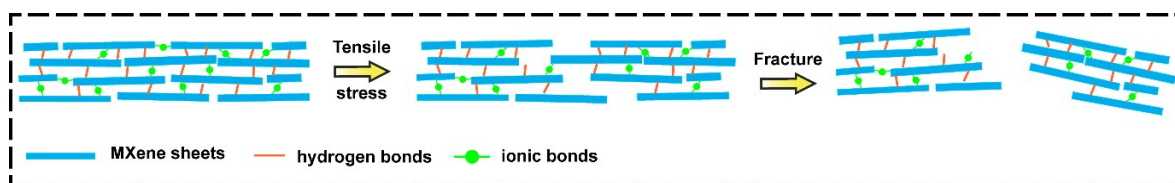

Fig. S7. Schematic illustrating tensile fracture process of the MXene-Al film.

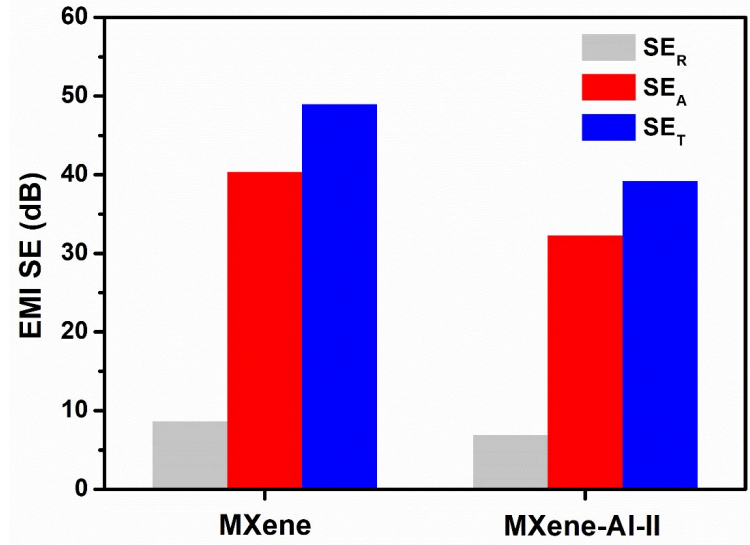

**Fig. S8.** Total EMI shielding effectiveness ( $SE_T$ ), absorption ( $SE_A$ ) and reflection ( $SE_R$ ) mechanism in pristine MXene and MXene-Al- II film.

The total SE ( $SE_{Total}$ ) and its components of absorption ( $SE_A$ ) and reflection ( $SE_R$ ) are determined on the basis of the measured S parameters:

$$R = 10^{(S_{11}/10)} \quad (1)$$

$$T = 10^{(S_{21}/10)} \quad (2)$$

$$A = 1 - R - T \quad (3)$$

Where R is the reflection coefficient, A is the absorption coefficient, and T is the transmission coefficient. The total EMI SE ( $SE_{Total}$ ) is the sum of reflection ( $SE_R$ ), absorption ( $SE_A$ ), and multiple reflections ( $SE_M$ ), and their relationships are expressed using the following equations:

$$SE_{Total} = SE_R + SE_A + SE_M \quad (4)$$

$$SE_R \text{ (dB)} = -10\log_{10}(1 - R) \quad (5)$$

$$SE_A \text{ (dB)} = -10\log_{10}(T/(1 - R)) \quad (6)$$

**Table S1.** Mechanical properties and conductivities of MXene and MXene-Al films.

| <b>Sample</b>       | <b>Strength (MPa)</b> | <b>Toughness (MJ m<sup>-3</sup>)</b> | <b>Strain (%)</b> | <b>Young's modulus (GPa)</b> | <b>Conductivity (S cm<sup>-1</sup>)</b> |
|---------------------|-----------------------|--------------------------------------|-------------------|------------------------------|-----------------------------------------|
| <b>MXene</b>        | 28.7 ± 4.3            | 0.332 ± 0.045                        | 2.2 ± 0.3         | 2.05 ± 0.12                  | 3143 ± 68                               |
| <b>MXene-Al I</b>   | 53.8 ± 2.9            | 0.496 ± 0.068                        | 1.6 ± 0.1         | 4.50 ± 0.26                  | 2733 ± 37                               |
| <b>MXene-Al II</b>  | 83.2 ± 1.7            | 0.657 ± 0.076                        | 1.8 ± 0.2         | 7.42 ± 0.12                  | 2656 ± 48                               |
| <b>MXene-Al III</b> | 73.1 ± 3.9            | 0.645 ± 0.033                        | 1.6 ± 0.1         | 6.24 ± 0.16                  | 2059 ± 51                               |
| <b>MXene-Al IV</b>  | 53.6 ± 2.3            | 0.363 ± 0.038                        | 1.3 ± 0.0         | 5.74 ± 0.08                  | 1018 ± 14                               |
| <b>MXene-Al V</b>   | 51.7 ± 0.3            | 0.230 ± 0.051                        | 0.8 ± 0.2         | 7.64 ± 1.40                  | 926 ± 40                                |

**Table S2.** Comparison of EMI shielding performances of the MXene-Al films with those reported in the literature.

| Sample                                                           | Thickness (mm) | EMI SE (dB) | SE/t (dB cm <sup>-1</sup> ) | Strength (MPa) | Conductivity (S m <sup>-1</sup> ) | Refs.     |
|------------------------------------------------------------------|----------------|-------------|-----------------------------|----------------|-----------------------------------|-----------|
| CNT sponge/epoxy                                                 | 2              | 33          | 165                         | 79.2           | 516                               | 1         |
| m-G/IP porous film                                               | 0.3            | 38          | 1267                        | 1.448          | 2310                              | 2         |
| Magnetic CNT paper                                               | 0.078          | 37          | 4744                        | 30             | 4330                              | 3         |
| rLGO film                                                        | 0.015          | 20.2        | 13467                       | 77.7           | 24300                             | 4         |
| CNT/NR30 film                                                    | 0.5            | 44.7        | 894                         | 20.6           | 2243                              | 5         |
| GNs/NFC film                                                     | 0.013          | 43          | 33077                       | 61             | 98820                             | 6         |
| GNR/PANI                                                         | 3.4            | 34          | 100                         | 56.2           | -                                 | 7         |
| EG/LGE                                                           | 0.043          | 48.3        | 11233                       | 40.9           | 146700                            | 8         |
| rGO/PI foam                                                      | 0.8            | 21          | 263                         | 11.4           | 0.8                               | 9         |
| AgNW/PANI                                                        | 0.013          | 51          | 39231                       | 44             | 402000                            | 10        |
| Ti <sub>3</sub> C <sub>2</sub> T <sub>x</sub> foam               | 0.06           | 70          | 11667                       | 4              | 58000                             | 11        |
| 87.5wt% Ti <sub>3</sub> C <sub>2</sub> T <sub>x</sub> /PEDOT:PSS | 0.011          | 42.1        | 38273                       | 13.7           | 34050                             |           |
| 83.3wt% Ti <sub>3</sub> C <sub>2</sub> T <sub>x</sub> /PEDOT:PSS | 0.012          | 28.2        | 23500                       | 17.59          | 18320                             | 12        |
| 80wt% Ti <sub>3</sub> C <sub>2</sub> T <sub>x</sub> /PEDOT:PSS   | 0.013          | 21.6        | 16615                       | 24.16          | 8330                              |           |
| 90wt% d-Ti <sub>3</sub> C <sub>2</sub> T <sub>x</sub> /CNFs      | 0.047          | 24          | 5106                        | 44.2           | 739.4                             |           |
| 80wt% d-Ti <sub>3</sub> C <sub>2</sub> T <sub>x</sub> /CNFs      | 0.074          | 26          | 3514                        | 60.2           | 115.5                             | 13        |
| 50wt% d-Ti <sub>3</sub> C <sub>2</sub> T <sub>x</sub> /CNFs      | 0.167          | 25          | 1497                        | 135.4          | 13.44                             |           |
| MXene/TOCNF                                                      | 0.038          | 39.6        | 10421                       | 212            | 2837                              | 14        |
| MXene/CNF/silver                                                 | 0.046          | 50.7        | 11022                       | 32.1           | 588.2                             | 15        |
| CNTs/Ti <sub>3</sub> C <sub>2</sub> /CNFs                        | 0.038          | 38.4        | 10105                       | 97.9           | 2506.6                            | 16        |
| 90wt% d-Ti <sub>3</sub> C <sub>2</sub> T <sub>x</sub> /ANFs      | 0.015          | 32.84       | 21893                       | 33.07          | 62827.2                           |           |
| 50wt% d-Ti <sub>3</sub> C <sub>2</sub> T <sub>x</sub> /ANFs      | 0.020          | 23.97       | 11985                       | 83.92          | 6960.6                            | 17        |
| 20wt% d-Ti <sub>3</sub> C <sub>2</sub> T <sub>x</sub> /ANFs      | 0.023          | 12.74       | 5539                        | 158.53         | 981.3                             |           |
| MXene                                                            | 0.005          | 49          | 98000                       | 28.7           | 314300                            |           |
| MXene-Al II                                                      | 0.005          | 45          | 90000                       | 83.2           | 265600                            | This work |
| MXene-Al V                                                       | 0.0044         | 41          | 93182                       | 69.2           | 92600                             |           |

## References:

1. Y. Chen, H.-B. Zhang, Y. Yang, M. Wang, A. Cao and Z.-Z. Yu, *Adv. Funct. Mater.*, 2016, **26**, 447-455.
2. J. Liu, H.-B. Zhang, Y. Liu, Q. Wang, Z. Liu, Y.-W. Mai and Z.-Z. Yu, *Compos. Sci.*

- Technol.*, 2017, **151**, 71-78.
3. G.-H. Lim, S. Woo, H. Lee, K.-S. Moon, H. Sohn, S.-E. Lee and B. Lim, *ACS Appl. Mater. Interfaces*, 2017, **9**, 40628-40637.
  4. P. Kumar, F. Shahzad, S. Yu, S. M. Hong, Y.-H. Kim and C. M. Koo, *Carbon*, 2015, **94**, 494-500.
  5. L.-C. Jia, M.-Z. Li, D.-X. Yan, C.-H. Cui, H.-Y. Wu and Z.-M. Li, *J. Mater. Chem. C*, 2017, **5**, 8944-8951.
  6. W. Yang, Y. Zhang, T. Liu, R. Huang, S. Chai, F. Chen and Q. Fu, *ACS Sustainable Chem. Eng.*, 2017, **5**, 9102-9113.
  7. A. Joshi, A. Bajaj, R. Singh, A. Anand, P. S. Alegaonkar and S. Datar, *Composites, Part B*, 2015, **69**, 472-477.
  8. Y. Liu, J. Zeng, D. Han, K. Wu, B. Yu, S. Chai, F. Chen and Q. Fu, *Carbon*, 2018, **133**, 435-445.
  9. Y. Li, X. Pei, B. Shen, W. Zhai, L. Zhang and W. Zheng, *RSC Adv.*, 2015, **5**, 24342-24351.
  10. F. Fang, Y.-Q. Li, H.-M. Xiao, N. Hu and S.-Y. Fu, *J. Mater. Chem. C*, 2016, **4**, 4193-4203.
  11. J. Liu, H.-B. Zhang, R. Sun, Y. Liu, Z. Liu, A. Zhou and Z.-Z. Yu, *Adv. Mater.*, 2017, **29**, 1702367.
  12. R. Liu, M. Miao, Y. Li, J. Zhang, S. Cao and X. Feng, *ACS Appl. Mater. Interfaces*, 2018, **10**, 44787-44795.
  13. W.-T. Cao, F.-F. Chen, Y.-J. Zhu, Y.-G. Zhang, Y.-Y. Jiang, M.-G. Ma and F. Chen, *ACS Nano*, 2018, **12**, 4583-4593.



14. Z. Y. Zhan, Q. C. Song, Z. H. Zhou and C. H. Lu, *J. Mater. Chem. C*, 2019, **7**, 9820-9829.
15. W. Xin, G.-Q. Xi, W.-T. Cao, C. Ma, T. Liu, M.-G. Ma and J. Bian, *RSC Adv.*, 2019, **9**, 29636-29644.
16. W. Cao, C. Ma, S. Tan, M. Ma, P. Wan and F. Chen, *Nano-Micro Lett.*, 2019, **11**, 72.
17. F. Xie, F. Jia, L. Zhuo, Z. Lu, L. Si, J. Huang, M. Zhang and Q. Ma, *Nanoscale*, 2019, **11**, 23382-23391.
